# Supplementary material for: Inertial-Based Filtration Method for Removal of Microcarriers from Mesenchymal Stem Cell Suspensions
Source: PubMed Central journal article supplement (PMC6102204; doi:10.1038/s41598-018-31019-y), 2018-08-20
Supplement: 41598_2018_31019_MOESM1_ESM.pdf [file 41598_2018_31019_MOESM1_ESM.pdf]

# Inertial-based filtration method for removal of microcarriers from mesenchymal stem cell suspensions

Reza Moloudi, Steve Oh, Chun Yang, Kim Leng Teo, Alan Tin-Lun Lam, Majid Ebrahimi Warkiani, and May Win Naing

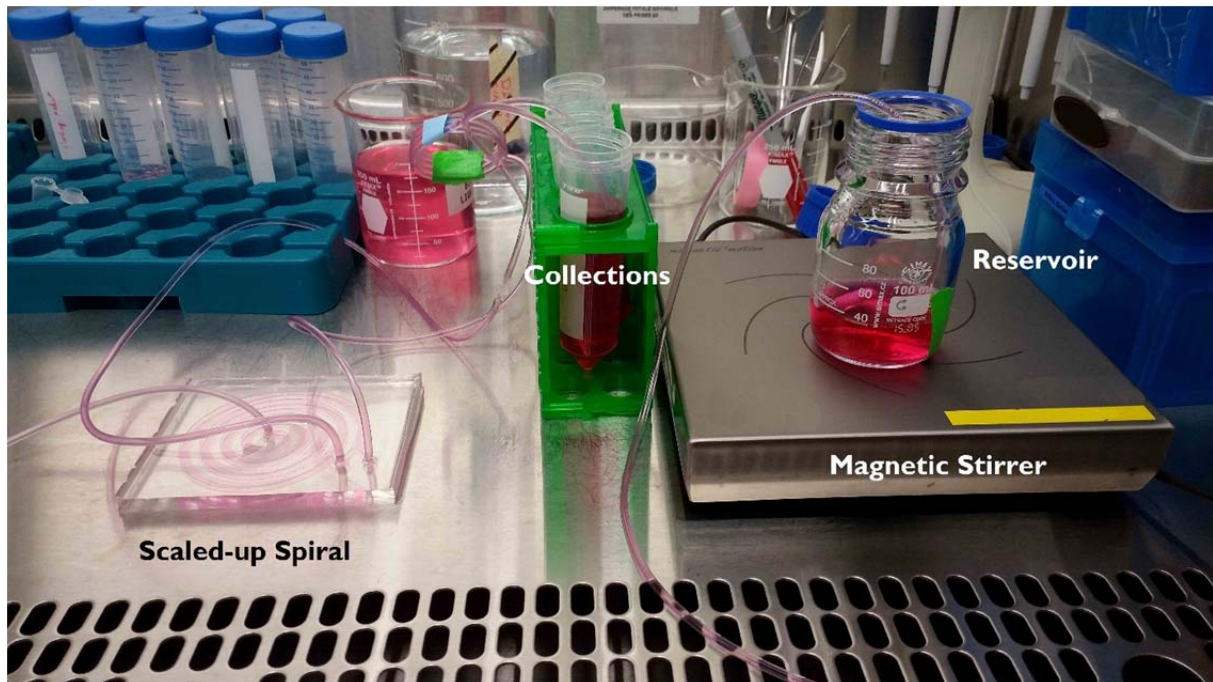

**Fig. S1** Experimental set up for separation of microcarriers from hMSCs

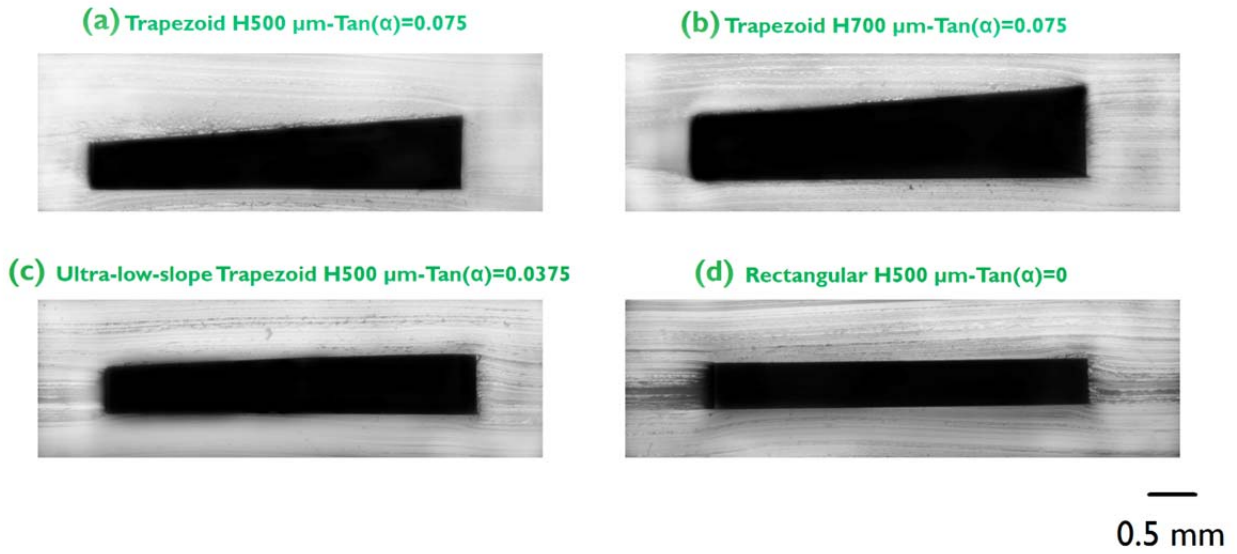

**Fig. S2** The cross-sections of fabricated trapezoid and rectangular spiral channels. All channel's widths are fixed at 4 mm.

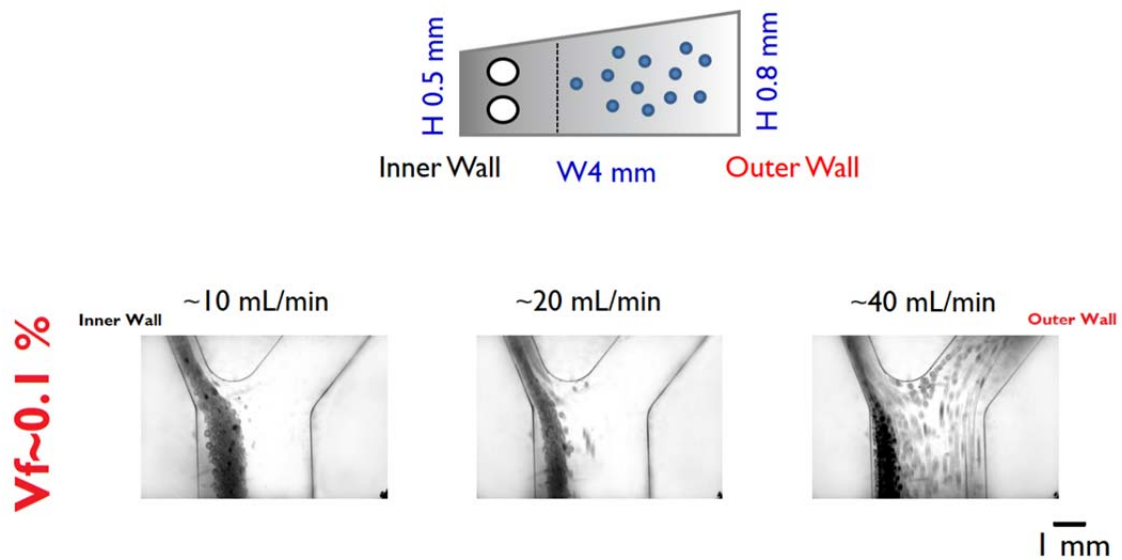

**Fig. S3** Microcarrier focusing dynamics at the bifurcation of trapezoid spiral channel with  $H=500\ \mu\text{m}$ ,  $\text{Tan}(\alpha)=0.075$  when the MC volume fraction is as low as  $\sim 0.1\%$ . It shows good-focusing and separation of MCs from the inner wall outlet at  $\sim 20\ \text{mL/min}$ .

**Trapezoid H500  $\mu\text{m}$ -Tan( $\alpha$ )=0.075-Increasing Dean Mode**

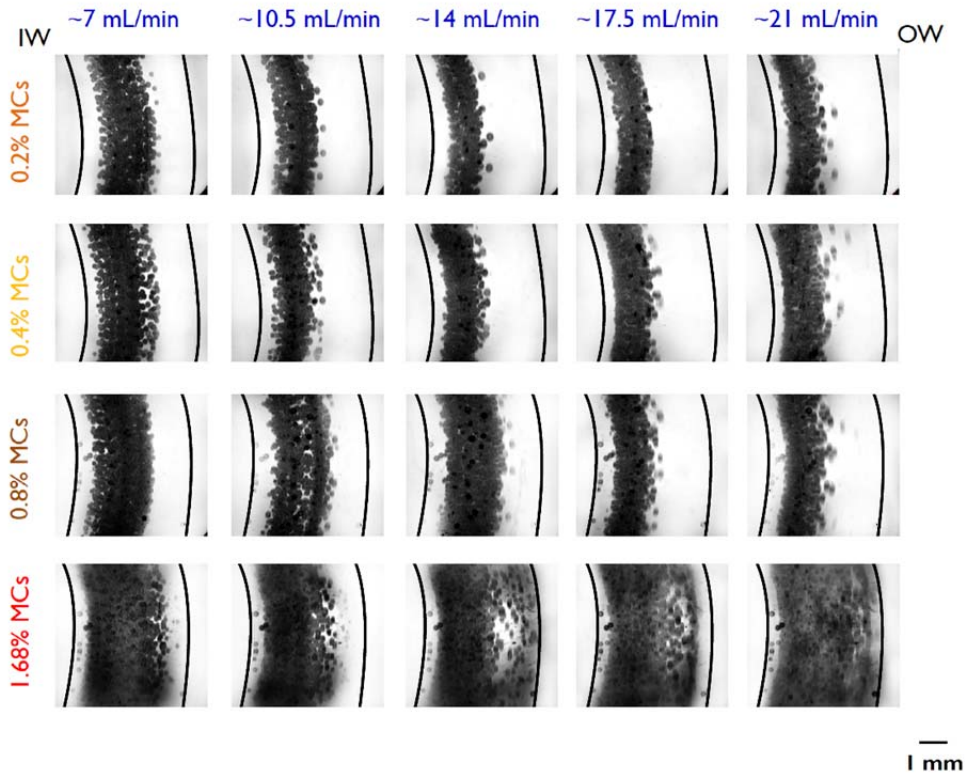

**Fig. S4** Microcarrier focusing dynamics in trapezoid spiral channel with  $H=500 \mu\text{m}$ ,  $\text{Tan}(\alpha)=0.075$  when Dean number increases across the spiral channel.

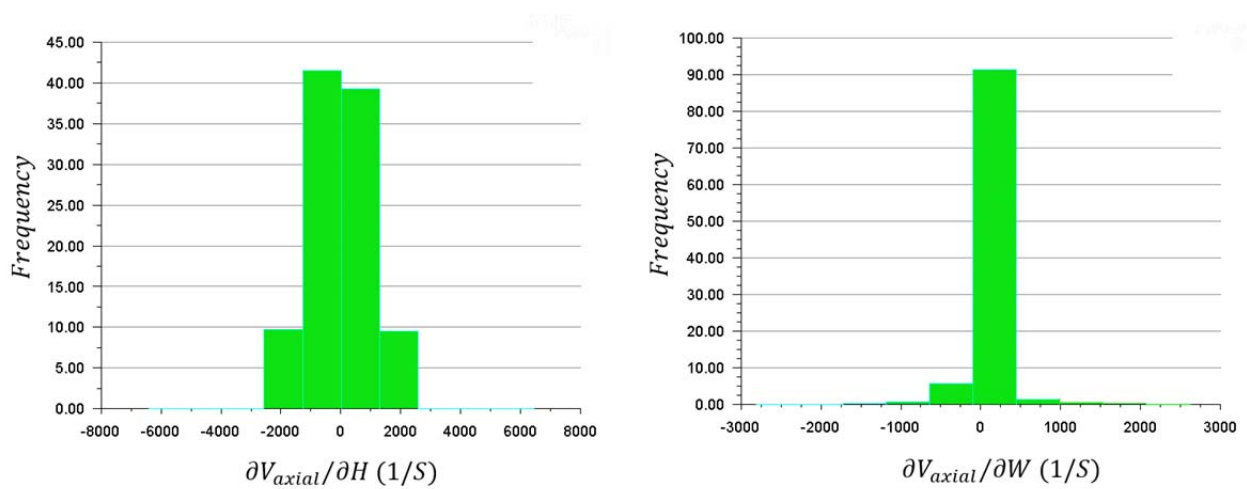

**Fig. S5** Histogram of two major shear rates across the ultra-low-slope trapezoid spiral channel,  $H=500 \mu\text{m}$ ,  $\text{Tan}(\alpha)=0.0375$ .

**Table S1.** MC count from the outer wall outlet sample (n=3) using the ultra-low-slope trapezoidal spiral

| MC volume fraction %                | 0.2  | 0.4     | 0.8    | 1.6      |
|-------------------------------------|------|---------|--------|----------|
| $C_o$ (MCs/mL)<br>Outer wall outlet | 0    | 7.6±2.5 | 24.3±4 | 41.6±7.6 |
| $C_s$ (MCs/mL)<br>Reservoir         | ~750 | ~1500   | ~3000  | ~6000    |
| E %                                 | 100  | 99.4    | 99.19  | 99.3     |

Note: To perform microcarrier (MC) count of the outer wall outlet collection, due to low concentration, 1-mL sample was dispersed into a petri dish and subsequently MCs were counted manually on the microscope stage using bright field.
